# Supplementary material for: Knowledge and attitude towards cutaneous leishmaniasis among rural endemic communities in Shara’b district, Taiz, southwestern Yemen
Source: Springer Nature journal article supplement (doi:10.1186/s12879-021-05965-4), 2021-03-17
Supplement: MOESM2 [file 18976304]

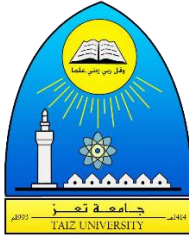

## QUESTIONNAIRE

**A community-based study on the knowledge and attitude towards cutaneous leishmaniasis among rural communities in endemic areas in Taiz**

### Reference No.

#### 1. PERSONAL INFORMATION

Name (optional):

.....

Age:

..... years

Sex:

Male  Female

Address (village name):

.....

Telephone no. (optional):

.....

Education:

Never go to school  Primary   
Secondary  Tertiary

Occupation:

Government employee   
Farmer  Student   
Housewife  Not working

Other: .....

No. of family members in the same household:

.....

#### 2. KNOWLEDGE ABOUT CUTANEOUS LEISHMANIASIS

Have you heard about cutaneous leishmaniasis before this time?

Yes  No

If Yes, what is CL?

.....

Have you ever got CL?

Yes  No

If yes,

- Since when? .....
- How many lesions scar: .....
- Site of lesions: .....

How can we know if someone has CL? .....

Have you ever seen individuals infected with CL? Yes  No

1- ..... 2- .....

What are the signs and symptoms you know related to CL? 3- ..... 4- .....

5- ..... 6- .....

Don't know

How CL can be transmitted? .....

Don't know

Summer  Autumn

In which season is CL more common? Winter  Spring

Don't know

If you get CL, what do you do? .....

1- .....

2- .....

How CL can be treated? 3- .....

Don't know

1- .....

2- .....

How CL can be prevented? 3- .....

4- .....

Don't know

Do you have mosquito bed nets at your household? Yes  No

**3. KNOWLEDGE ABOUT CL VECTOR**

Have you ever seen sand flies? Yes  No

If yes,

- Have you observed sand flies at your household area? Yes  No

- During what hours of the day? .....

In what places sand flies can be commonly found?

1- .....

2- .....

3- .....

Don't know

Can you distinguish sand flies from other flies and mosquitoes?

Yes  No

If yes; please tell me how?

.....  
.....

What are the diseases transmitted by sand flies?

1- .....

2- .....

3- .....

Don't know

During what hours of the day sand flies can bite individuals?

Morning  Night

Day time  Any time

From dusk to sunrise  Don't know

Other: .....

How the sand flies can be controlled?

1- .....

2- .....

3- .....

4- .....

Don't know

#### 4. ATTITUDE TOWARDS CUTANEOUS LEISHMANIASIS

Is CL a serious disease?

Yes  No  Don't know

Is CL more dangerous than Malaria?

Yes  No  Don't know

Is CL curable?

Yes  No  Don't know

Is CL preventable?

Yes  No  Don't know

Could CL be transmitted by direct contact from person to person?

Yes  No  Don't know

Family  Friends

School  Media

From where you came to know about CL?

History of infection

Other: .....

Don't remember

**-Thank you for your kind cooperation-**
